# Supplementary material for: The Dose-Response Relationship between Alcohol Consumption and the Risk of Type 2 Diabetes among Asian Men: A Systematic Review and Meta-Analysis of Prospective Cohort Studies
Source: Hindawi journal article supplement (doi:10.1155/2020/1032049), 2020-08-24
Supplement: f1 [file 1032049.f1.pdf]

Supplement Table 1 Subgroup analysis of T2D risk for alcohol intake versus the lowest intake.

| Subgroup                   | Alcohol intake vs. none alcohol intake |                 |                  | Highest vs. lowest category |                 |                  |
|----------------------------|----------------------------------------|-----------------|------------------|-----------------------------|-----------------|------------------|
|                            | Number of database                     | RR(CI 95%)      | P <sub>Het</sub> | Number of database          | RR(CI 95%)      | P <sub>Het</sub> |
| <b>Age</b>                 |                                        |                 |                  |                             |                 |                  |
| <50 years old              | 5                                      | 0.98(0.82,1.17) | 0.003            | 5                           | 1.19(1.03,1.38) | 0.859            |
| ≥50 years old              | 3                                      | 1.07(0.81,1.41) | 0.001            | 3                           | 1.15(0.92,1.44) | 0.06             |
| <b>Region</b>              |                                        |                 |                  |                             |                 |                  |
| Japan                      | 4                                      | 1.03(0.87,1.23) | 0.01             | 4                           | 1.19(1.03,1.38) | 0.736            |
| Korea                      | 2                                      | 0.98(0.54,1.78) | 0.006            | 2                           | 0.96(0.73,1.27) | 1                |
| China                      | 2                                      | 0.98(0.73,1.31) | 0.009            | 2                           | 1.32(1.02,1.71) | 0.045            |
| <b>Follow-up durations</b> |                                        |                 |                  |                             |                 |                  |
| <5 years                   | 2                                      | 1.02(0.86,1.21) | <0.001           | 2                           | 1.20(1.00,1.44) | 0.383            |
| ≥5 years                   | 6                                      | 0.96(0.60,1.48) | 0.021            | 6                           | 1.15(1.01,1.32) | 0.283            |
| <b>Study time</b>          |                                        |                 |                  |                             |                 |                  |
| Before 2010                | 4                                      | 0.93(0.74,1.16) | 0.002            | 4                           | 1.17(1.00,1.36) | 0.836            |
| After 2010                 | 4                                      | 1.09(0.88,1.35) | 0.001            | 4                           | 1.18(0.98,1.42) | 0.097            |
| <b>Sample</b>              |                                        |                 |                  |                             |                 |                  |
| <10000                     | 6                                      | 1.01(0.86,1.19) | 0.007            | 6                           | 1.23(1.08,1.39) | 0.874            |
| ≥10000                     | 2                                      | 1.01(0.72,1.40) | <0.001           | 2                           | 1.08(0.81,1.44) | 0.059            |
| <b>Cases</b>               |                                        |                 |                  |                             |                 |                  |
| <500                       | 5                                      | 0.98(0.81,1.19) | 0.007            | 5                           | 1.21(1.03,1.41) | 0.796            |
| ≥500                       | 3                                      | 1.05(0.83,1.33) | <0.001           | 3                           | 1.14(0.93,1.39) | 0.077            |
| <b>NOS score</b>           |                                        |                 |                  |                             |                 |                  |
| <8                         | 4                                      | 0.97(0.79,1.20) | 0.002            | 4                           | 1.14(0.93,1.41) | 0.153            |
| ≥8                         | 4                                      | 1.05(0.86,1.28) | 0.005            | 4                           | 1.20(1.05,1.38) | 0.702            |
