# Supplementary material for: The Dose-Response Relationship between Alcohol Consumption and the Risk of Type 2 Diabetes among Asian Men: A Systematic Review and Meta-Analysis of Prospective Cohort Studies
Source: Hindawi journal article supplement (doi:10.1155/2020/1032049), 2020-08-24
Supplement: f2 [file 1032049.f2.pdf]

## Supplementary file

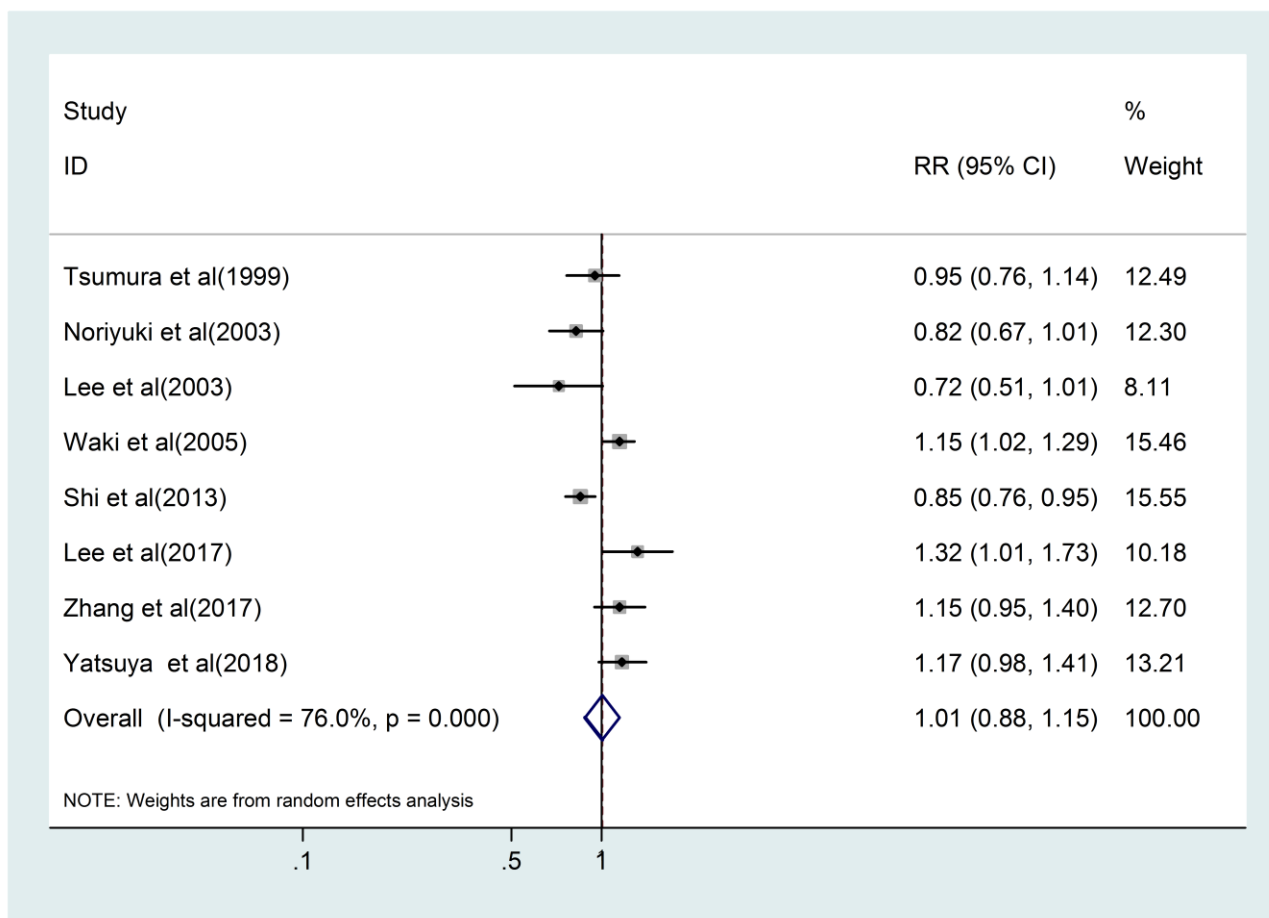

Supplementary Figure 1. The forest plot of alcohol consumption and the risk of T2D (drinking vs. none drinking).
